# Supplementary material
Source: Springer Nature journal article supplement (https://www.springermedizin.de/resource/supplementary/12913_2013_3749_MOESM1_ESM.pdf/9532306)
Supplement: MOESM1 [file 9532306]

### Workshop 1: Future health

#### Workshop

1. Advertised widely in community.
2. Interviewed hard to reach members of community.
3. Point is to establish local context and introduce thinking about health.

#### Discussed:

1. What are participants' aspirations for the community's future?
2. What is the role of health in that?
3. What are key health issues 'round here'?

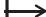

### Workshop 2: Health evidence

#### Workshop

1. Advertised widely in community.
2. Interviewed hard to reach community members.
3. Brought evidence about local health & wellbeing from NHS/ national databases.

#### Discussed:

1. How do your perceptions of local health compare with data that managers are using?
2. Given this information, what are your priorities for health in this community?

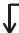

### Workshop 3: Service road show

#### Workshop

1. Advertised widely in community.
2. Used priorities from workshop 3 to identify services and initiatives to present to community.

#### Discussed:

1. Latest ways to address community priority areas.
2. Innovative models implemented by other rural communities.
3. Innovations in workforce & infrastructure.

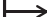

### Workshop 4: Planning exercise

#### Workshop

1. Advertised widely in community.
2. Built on previous information.
3. Brought a budget.
4. Structured process worked from priorities to a plan.

#### Discussed:

1. Community health priorities
  2. Competencies needed local to address these
- Key principles**
3. Workforce & infrastructure model that fit within budget
  4. Multi stakeholder planning simulation
